# Supplementary material
Source: Research Square preprint supplement (doi:10.21203/rs.3.rs-9475092/v1)
Supplement: Supplementary file 1 [file 3def4ff0589672850200e664.docx]

# Additional information

**Supplementary Information**

Supplementary Information

**Correspondence** and requests for materials should be addressed to H.I.N and L.K.W


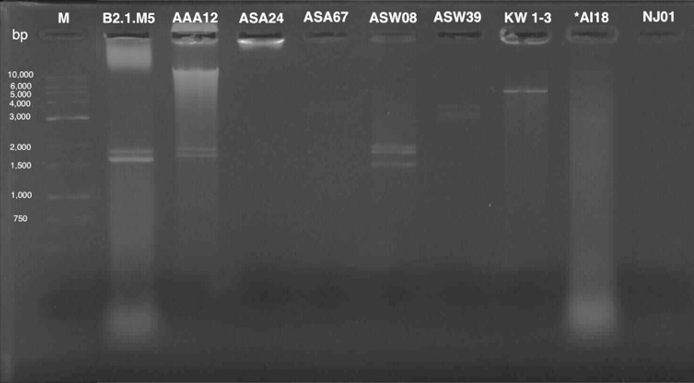


**Fig. S1** Detection of dsRNA elements in *Aspergillus* isolates. Agarose gel electrophoresis of double-stranded RNA (dsRNA) extracted from *Aspergillus* isolates using the phenol–chloroform method. Lane M: molecular size marker (bp). Lanes correspond to isolates B2.1.M5, AAA12, ASA24, ASA67, ASW08, ASW39, KW1-3, AI18, and NJ01. Distinct dsRNA bands of varying sizes indicate the presence of mycoviral elements in these isolates.

**Table S1.** BLASTn results of Aspergillus fumigatus partitivirus AAA12 (AfuPV-AAA12) RNA1.

| **Accession No.** | **Virus Description** | **Host Species** | **% Identity** | **Length (bp)** | **Gene / Segment** | **Family** |
| --- | --- | --- | --- | --- | --- | --- |
| PX123377.1 | Aspergillus fumigatus partitivirus 1 isolate Af02, RNA1 | *Aspergillus fumigatus* | 97.03 | 1777 | RNA1 (RdRp) | Partitiviridae |
| PX123379.1 | A. fumigatus partitivirus 1 isolate Af04, RNA1 | *Aspergillus fumigatus* | 96.47 | 1743 | RNA1 (RdRp) | Partitiviridae |
| FN376847.3 | A. fumigatus partitivirus 1 isolate 88, segment 1 | *Aspergillus fumigatus* | 95.06 | 1779 | RdRp | Partitiviridae |
| MK279458.1 | Magnaporthe grisea partitivirus 1 strain MgPv1M82 RNA1 | *Magnaporthe grisea* | 82.00 | 1725 | RNA1 (RdRp) | Partitiviridae |
| KJ868800.1 | Ustilaginoidea virens partitivirus S1 (putative RdRp) | *Ustilaginoidea virens* | 80.87 | 1462 | RdRp | Partitiviridae |
| KC422244.1 | Verticillium dahliae partitivirus 1 strain Vd08284 | *Verticillium dahliae* | 80.11 | 1768 | RdRp | Partitiviridae |
| KR074421.1 | Colletotrichum truncatum partitivirus 1 isolate GS | *Colletotrichum truncatum* | 80.17 | 1820 | RdRp | Partitiviridae |
| KC503898.1 | Ustilaginoidea virens partitivirus segment 1 | *Ustilaginoidea virens* | 80.06 | 1775 | RNA1 | Partitiviridae |
| OQ941780.1 | Magnaporthe oryzae partitivirus 4 strain P73 | *Magnaporthe oryzae* | 80.31 | 1778 | RdRp | Partitiviridae |
| OQ463852.1 | Trichoderma harzianum partitivirus 3 isolate 4-67 | *Trichoderma harzianum* | 80.25 | 1753 | RNA1 | Partitiviridae |
| MH231404.1 | Magnaporthe oryzae partitivirus 3 isolate NJ01 | *Magnaporthe oryzae* | 80.11 | 1776 | RdRp | Partitiviridae |
| PZ130439.1 | Erysiphe necator associated partitivirus 3 isolate 53_11 | *Erysiphe necator* | 79.97 | 1646 | RdRp | Partitiviridae |
| PV941786.1 | Cladosporium anthropophilum partitivirus 1 isolate CaPV1 | *Cladosporium anthropophilum* | 78.68 | 1772 | RNA1 | Partitiviridae |
| LN896305.1 | Beauveria bassiana partitivirus 2 RdRp gene | *Beauveria bassiana* | 76.44 | 1801 | RdRp | Partitiviridae |
| NC_038872.1 | Aspergillus fumigatus chrysovirus A-56 | *Aspergillus fumigatus* | - | 3560 | RNA1 (RdRp) | Chrysoviridae |
| NC_078127.1 | Aspergillus fumigatus tetramycovirus-1 | *Aspergillus fumigatus* | - | 2403 | RNA1 (RdRp) | Polymycoviridae |

**Table S2.** Aflatoxin production by virus-infected (VI) and virus-free (VF) *A. fumigatus* AAA12 isolates.

| **Isolate** | **Aflatoxin** | **VI (μg/kg)** | **VF (μg/kg)** |
| --- | --- | --- | --- |
| *A. fumigatus* | Aflatoxin B1 | 0.85 ± 0.12b | 3.15 ± 0.14a |
| AAA12 | Aflatoxin B2 | ND | ND |
|  | Aflatoxin G1 | 0.72 ± 0.08b | 8.28 ± 0.04a |
|  | Aflatoxin G2 | ND | ND |
|  | Total Aflatoxin | 1.57 ± 0.17b | 11.43 ± 0.25a |

Values are presented as mean ± SD. Different superscript letters within the same row indicate significant differences between treatments (p < 0.05).

ND = not detected.

**Table S3.** Effects of virus-infected (VI) and virus-free (VF) *A. fumigatus* AAA12 on aflatoxin production in dual-culture assays.

| **Isolate** | **Aflatoxin** | **Control (μg/kg)** | **VI (μg/kg)** | **VF (μg/kg)** |
| --- | --- | --- | --- | --- |
| *A. flavus* | Aflatoxin B1 | 151.23 ± 0.18a | 97.14 ± 1.44b | 94.56 ± 0.61b |
| AAA19 | Aflatoxin B2 | 2.22 ± 0.03a | 1.30 ± 0.02c | 1.54 ± 0.05b |
|  | Aflatoxin G1 | ND | ND | ND |
|  | Aflatoxin G2 | ND | ND | ND |
|  | Total Aflatoxin | 153.45 ± 2.10a | 98.44 ± 1.35b | 96.10 ± 0.80b |
| *A. flavus* | Aflatoxin B1 | 117.84 ± 0.52a | 89.86 ± 0.95b | 77.63 ± 0.94c |
| AAA20 | Aflatoxin B2 | 1.53 ± 0.03a | 1.34 ± 0.03b | 0.84 ± 0.06c |
|  | Aflatoxin G1 | ND | 5.34 ± 0.35 | ND |
|  | Aflatoxin G2 | ND | ND | ND |
|  | Total Aflatoxin | 119.37 ± 0.63a | 96.55 ± 1.53b | 78.47 ± 0.46c |
| *A. nomiae* | Aflatoxin B1 | 429.24 ± 6.20b | 527.21 ± 8.31a | 501.74 ± 8.26a |
| AAA21 | Aflatoxin B2 | ND | ND | ND |
|  | Aflatoxin G1 | 163.03 ± 2.71a | 43.91 ± 1.98c | 55.81 ± 0.72b |
|  | Aflatoxin G2 | ND | ND | ND |
|  | Total Aflatoxin | 592.27 ± 6.98a | 571.12 ± 2.50a | 557.55 ± 8.12a |
| *A. nomiae* | Aflatoxin B1 | 543.72 ± 6.73c | 804.22 ± 9.29a | 753.67 ± 9.82b |
| AAA22 | Aflatoxin B2 | ND | ND | ND |
|  | Aflatoxin G1 | 175.47 ± 3.77a | 44.59 ± 1.18c | 92.88 ± 2.20b |
|  | Aflatoxin G2 | ND | ND | ND |
|  | Total Aflatoxin | 719.19 ± 5.42b | 848.81 ± 6.69a | 846.55 ± 9.65a |

Values are presented as mean ± SD. Different superscript letters within the same row indicate significant differences between treatments (p < 0.05).

ND = not detected.
